# Supplementary material
Source: publisher figshare collection journal article supplement (https://acs.figshare.com/ndownloader/files/5985003)
Supplement: Supplementary file 1 [file 5985003]

# Supporting Information

## Adventitious Water Sorption in a Hydrophilic and a Hydrophobic Ionic Liquid: Analysis and Implications

Radhika S. Anareddy<sup>†</sup>, Anthony J. Lucio<sup>†</sup>, and Scott K. Shaw\*

University of Iowa, Department of Chemistry, E331 Chemistry Building, Iowa City, Iowa 52242, United States

<sup>†</sup>Equal Contribution, \*Corresponding Author

### TABLE OF CONTENTS:

1. Cover Page / Table of Contents
2. Figure S1: electrochemical analysis of water in EAN,
3. Figure S2: electrochemical analysis of water in N1114 TFSI,
4. Figure S3: CVs to demonstrate the potential axis correction,
5. Figure S4: Full FTIR spectrum of EAN and N1114 TFSI with varying water,
6. Table S1: compiled results from KF analysis of EAN,
7. Table S2: compiled results from KF analysis of N1114 TFSI.

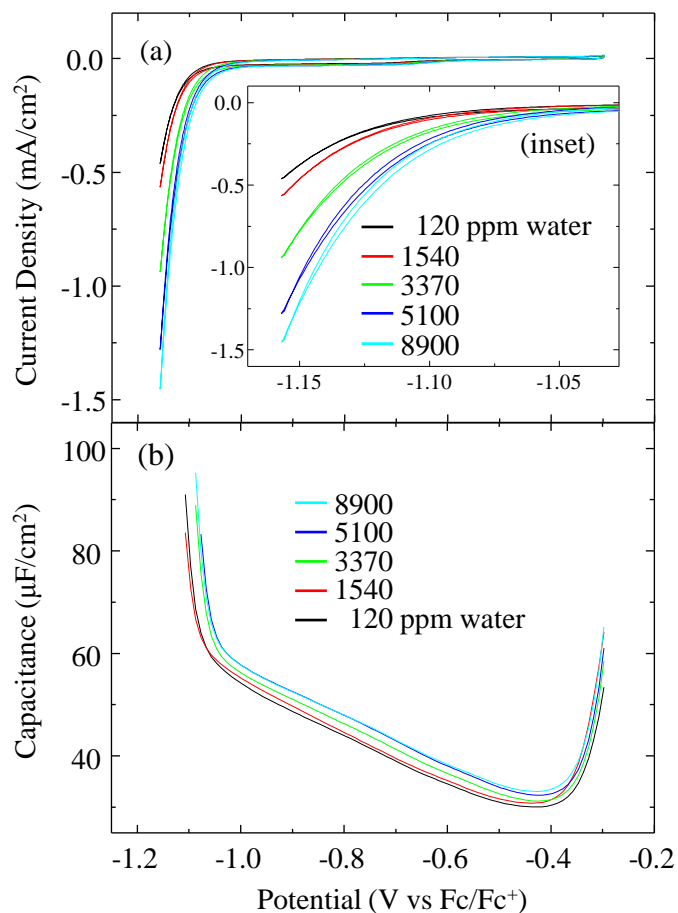

Figure S1. Cyclic voltammograms (a) and capacitance curves (b) from an Ag electrode in EAN solutions of varying water contents as noted. Inset in (a) shows cathodic limit to illustrates lower HER overpotentials at higher water concentrations. CV sweep rate is 50 mV/s. Capacitance frequency and amplitude are 10 Hz and 5 mV, respectively.

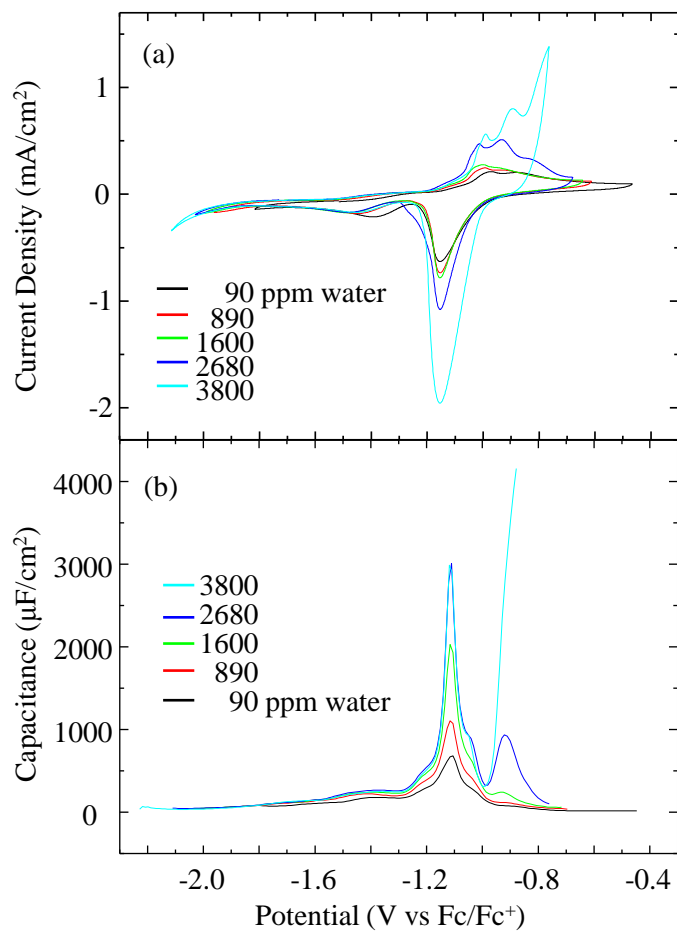

Figure S2. Cyclic voltammograms (a) and capacitance curves (b) for an Ag electrode in N1114 TFSI solutions with varying water concentration as noted. CV sweep rate is 50 mV/s. Capacitance frequency and amplitude are 10 Hz and 5 mV, respectively.

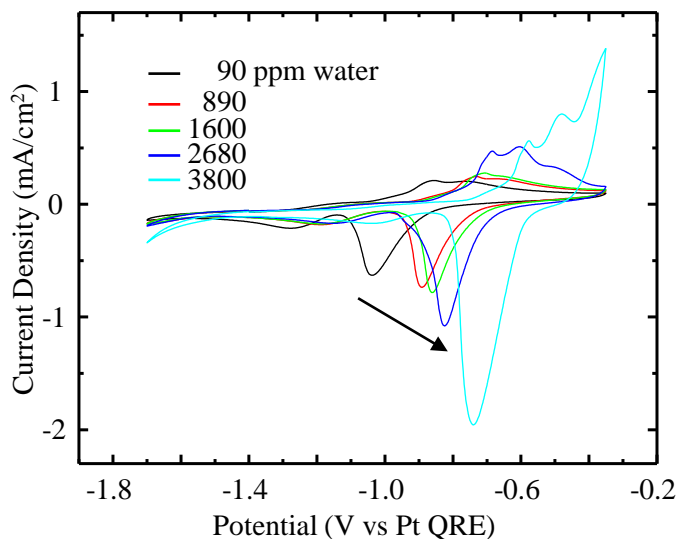

Figure S3. Cyclic voltammograms at 50 mV/s demonstrating the shift in the cathodic peak feature as a function of water uptake in N1114 TFSI. This drift was corrected for by normalizing cathodic peaks to that of the driest sample (< 100 ppm water), located at -1.1 V vs Pt QRE. Ag cathode used.

Electrochemical data N1114 TFSI show a drift in the potential axis ascribed to significant oxidation of the Pt quasi-reference electrode used here. This is evidenced by the cathodic feature at ca. -1 V vs Pt QRE, corresponding to reduction of Ag-oxide from the working electrode, clearly shifting to more positive potentials as the concentration of water is increased. It is generally understood that Pt quasi-reference electrode potentials are established through formation of oxides on the Pt metal surface. However, the exact chemistry is likely to vary depending on the system being studied as the electrode interacts with components in the surrounding solution.<sup>31</sup> To allow useful evaluation of the data, the location of the Ag-oxide reduction is normalized to that of the driest IL sample (90 ppm H<sub>2</sub>O) at ca. -1 V vs Pt QRE. This is reasonable as the formal reduction potential for the Ag/Ag<sub>2</sub>O redox couple should not change appreciably.

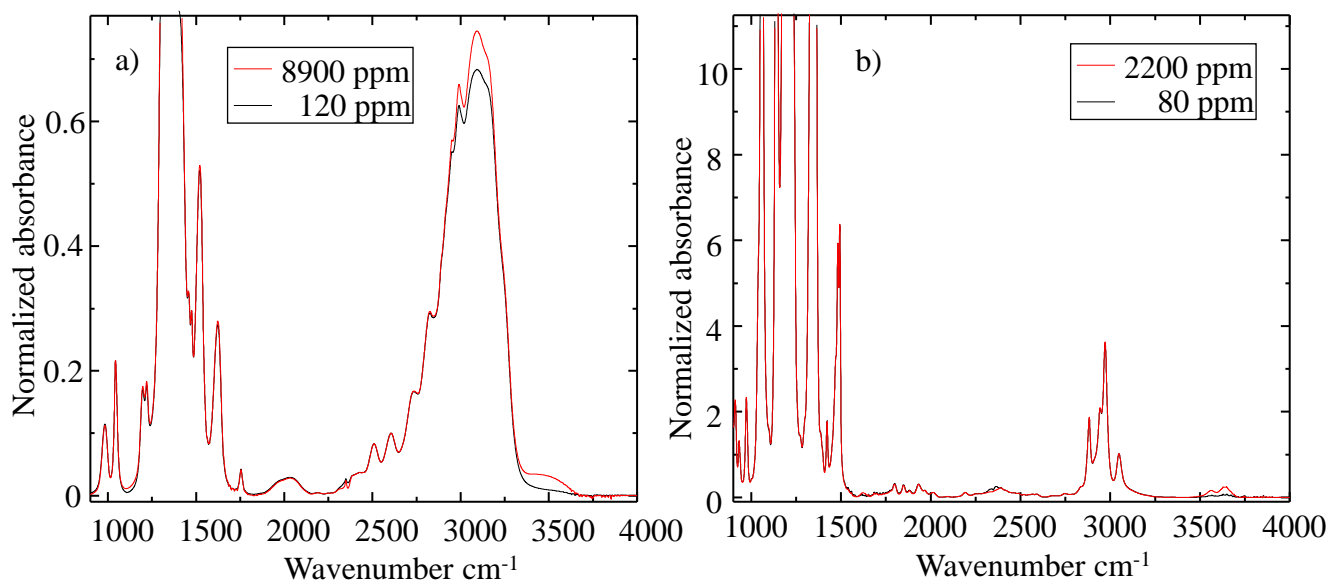

Figure S4. FTIR spectra of EAN (a) and N1114 TFSI (b) with varying concentration of water.

Table S1. Water content measurements in EAN using Karl Fisher titration.

| Time    | Water content (ppm) |           |           | Mean | Std dev | Total mean | Pooled std dev |
|---------|---------------------|-----------|-----------|------|---------|------------|----------------|
| 0 mins  | Aliquot 1           | Aliquot 2 | Aliquot 3 |      |         |            |                |
| Trial 1 | 133                 | 104       | 126       | 121  | 15      | 117        | 12             |
| Trial 2 | 158                 | 142       |           | 150  | 11      |            |                |
| Trial 3 | 78                  | 84        |           | 81   | 4       |            |                |
| 5 mins  | Aliquot 1           | Aliquot 2 | Aliquot 3 |      |         |            |                |
| Trial 1 | 1525                | 1552      |           | 1539 | 19      | 1139       | 51             |
| Trial 2 | 808                 | 930       | 933       | 890  | 71      |            |                |
| Trial 3 | 988                 | 988       |           | 988  | 0.4     |            |                |
| 10 mins | Aliquot 1           | Aliquot 2 | Aliquot 3 |      |         |            |                |
| Trial 1 | 3326                | 3405      |           | 3365 | 56      | 2486       | 53             |
| Trial 2 | 2633                | 2678      |           | 2655 | 31      |            |                |
| Trial 3 | 1369                | 1474      | 1471      | 1438 | 60      |            |                |
| 15 mins | Aliquot 1           | Aliquot 2 | Aliquot 3 |      |         |            |                |
| Trial 1 | 4962                | 5256      |           | 5109 | 208     | 3615       | 120            |
| Trial 2 | 3421                | 3579      |           | 3500 | 111     |            |                |
| Trial 3 | 2213                | 2225      | 2272      | 2237 | 31      |            |                |
| 20 mins | Aliquot 1           | Aliquot 2 | Aliquot 3 |      |         |            |                |
| Trial 1 | 8775                | 8995      |           | 8885 | 155     | 5999       | 167            |
| Trial 2 | 5523                | 5707      | 5387      | 5539 | 160     |            |                |
| Trial 3 | 3369                | 3606      | 3743      | 3573 | 189     |            |                |

Table S2. Water content measurements in N1114 TFSI using Karl Fisher titration.

| Time    | Water content (ppm) |           |           | Mean | Std dev | Total mean | Pooled std dev |
|---------|---------------------|-----------|-----------|------|---------|------------|----------------|
| 0 mins  | Aliquot 1           | Aliquot 2 | Aliquot 3 |      |         |            |                |
| Trial 1 | 56                  | 55        |           | 56   | 0.7     | 78         | 12             |
| Trial 2 | 86                  | 88        | 105       | 93   | 10      |            |                |
| Trial 3 | 71                  | 97        |           | 84   | 19      |            |                |
| 20 mins | Aliquot 1           | Aliquot 2 | Aliquot 3 |      |         |            |                |
| Trial 1 | 432                 | 443       | 450       | 442  | 9       | 579        | 20             |
| Trial 2 | 874                 | 913       |           | 894  | 27      |            |                |
| Trial 3 | 382                 | 420       |           | 401  | 27      |            |                |
| 40 mins | Aliquot 1           | Aliquot 2 | Aliquot 3 |      |         |            |                |
| Trial 1 | 815                 | 824       |           | 819  | 7       | 1061       | 22             |
| Trial 2 | 1594                | 1602      | 1620      | 1605 | 13      |            |                |
| Trial 3 | 785                 | 730       |           | 758  | 39      |            |                |
| 60 mins | Aliquot 1           | Aliquot 2 | Aliquot 3 |      |         |            |                |
| Trial 1 | 1097                | 1083      | 1116      | 1099 | 17      | 1704       | 20             |
| Trial 2 | 2704                | 2659      |           | 2682 | 31      |            |                |
| Trial 3 | 1327                | 1333      |           | 1330 | 4       |            |                |
| 80 mins | Aliquot 1           | Aliquot 2 | Aliquot 3 |      |         |            |                |
| Trial 1 | 1637                | 1634      |           | 1636 | 3       | 2548       | 70             |
| Trial 2 | 3904                | 3708      |           | 3806 | 138     |            |                |
| Trial 3 | 2190                | 2209      | 2211      | 2204 | 12      |            |                |
